# Supplementary material
Source: PubMed Central journal article supplement (PMC1769080)
Supplement: heart_91_9_1235__1.pdf [file heart_91_9_1235__1.pdf]

## Patients cognition's in cardiovascular disease (htt25269)

SP Hirani and SP Newman

### Web only references

1. Lau RR, Hartman KA. Common sense representations of common illnesses. *Health Psychol* 1983;**2**:167–85.
2. Leventhal H, Meyer D, Nerenz D. The common sense model of illness danger. *Medical Psychol* 1980;**2**:7–30.
3. Eifert GH, Thompson RN, Zvolensky MJ, *et al.* The cardiac anxiety questionnaire: development and preliminary validity. *Behav Res Ther* 2000;**38**:1039–53.
4. Riegel BJ, Dracup KA, Glaser D. A longitudinal causal model of cardiac invalidism following myocardial infarction. *Nurs Res* 1998;**47**:285–92.
5. Petrie KJ, Weinman JA. Illness representations and recovery from myocardial infarction. In: Petrie K, Weinman J, Eds. *Perceptions of health and illness: Current research and applications*. Amsterdam, Netherlands: Harwood Academic Publishers, 1997:441–61.
6. Fiske ST, Taylor SE. *Social Cognition*. New York: Random House, 1984.
7. Weiner B. A cognitive (attribution)-emotion-action model of motivated behavior: An analysis of judgments of help-giving. *J Pers Soc Psychol* 1980;**39**:186–200.
8. Bulman R, Wortman CB. Attributions of blame and coping in the “real world”: Severe accident victims react to their lot. *J Pers Soc Psychol* 1977;**35**:351–63.
9. de Valle MN, Norman P. Causal attributions, health locus of control beliefs and lifestyle changes among pre-operative coronary patients. *Psychol Health* 1992;**7**:201–
- 11.

10. Weinman J, Petrie KJ, Sharpe N, *et al.* Causal attributions in patients and spouses following first-time myocardial infarction and subsequent lifestyle changes. *Br J Health Psychol* 2000;**5**:263–73.
11. Mahler HI, Kulik JA. Preferences for health care involvement, perceived control and surgical recovery: A prospective study. *Soc Sci Med* 1990;**31**:743–51.
12. Horne R, Weinman J. Patients' beliefs about prescribed medicines and their role in adherence to treatment in chronic physical illness. *J Psychosom Res* 1999;**47**:555–67.
13. Blumenthal JA, Lett HS, Babyak MA, *et al.* Depression as a risk factor for mortality after coronary artery bypass surgery. *Lancet* 2003;**362**:604–9.
14. Coyne JC, Racioppo MW. Never the twain shall meet? Closing the gap between coping research and clinical intervention research. *Am Psychol* 2000;**55**:655–64.
15. Schwarzer R. *Self-efficacy: Thought control of action*. Washington, DC: Hemisphere, 1992.
16. Furze G, Roebuck A, Bull P, *et al.* A comparison of the illness beliefs of people with angina and their peers: a questionnaire study. *BMC Cardiovasc Disord* 2002;**2**: 37.
17. Wynn A. Unwarranted emotional distress in men with ischaemic heart disease. *Med J Aust* 1967;**2**:847–51.
18. Maeland JG, Havik OE. Use of health services after a myocardial infarction. *Scand J Soc Med* 1989;**17**:93–102.
